# Supplementary material for: Catalog of NO x emissions from point sources as derived from the divergence of the NO 2 flux for TROPOMI
Source: Copernicus journal article supplement (doi:10.5194/essd-13-2995-2021), 2021-06-24
Supplement: Supplementary file 1 [file essd-13-2995-2021-supplement.zip]

Archive with 4 entries (4 files):
- mask.nc
- catalog_v1_1.zip
- essd_2020_280_supp.pdf
- essd-13-2995-2021-supplement-title-page.pdf
