# Supplementary material for: Catalog of NO x emissions from point sources as derived from the divergence of the NO 2 flux for TROPOMI
Source: Copernicus journal article supplement (doi:10.5194/essd-13-2995-2021), 2021-06-24
Supplement: Supplementary file 1 [file essd-13-2995-2021-supplement.zip › essd-13-2995-2021-supplement-title-page.pdf]

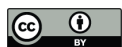

## *Supplement of*

# **Catalog of $\text{NO}_x$ emissions from point sources as derived from the divergence of the $\text{NO}_2$ flux for TROPOMI**

**Steffen Beirle et al.**

*Correspondence to:* Steffen Beirle ([steffen.beirle@mpic.de](mailto:steffen.beirle@mpic.de))

- [essd-13-2995-2021-supplement-title-page.pdf](#)
- [catalog\\_v1\\_1.zip](#)
- [essd\\_2020\\_280\\_supp.pdf](#)
- [mask.nc](#)

The copyright of individual parts of the supplement might differ from the article licence.
