# Supplementary material for: Catalog of NO x emissions from point sources as derived from the divergence of the NO 2 flux for TROPOMI
Source: Copernicus journal article supplement (doi:10.5194/essd-13-2995-2021), 2021-06-24
Supplement: Supplementary file 1 [file essd-13-2995-2021-supplement.zip › essd_2020_280_supp.pdf]

**Supplementary materials for**  
**Catalog of NO<sub>x</sub> emissions from point sources**  
**as derived from the divergence of the NO<sub>2</sub> flux for TROPOMI**

**Steffen Beirle<sup>1</sup>, Christian Borger<sup>1</sup>, Steffen Dörner<sup>1</sup>, Henk Eskes<sup>2</sup>, Vinod Kumar<sup>1</sup>, Adrianus de Laat<sup>2</sup>,  
and Thomas Wagner<sup>1</sup>**

<sup>1</sup>Max-Planck-Institut für Chemie (MPI-C), Mainz, Germany

<sup>2</sup>Koninklijk Nederlands Meteorologisch Instituut (KNMI), De Bilt, Netherlands

**Correspondence:** Steffen Beirle  
steffen.beirle@mpic.de

## Contents

|          |                                                                             |           |
|----------|-----------------------------------------------------------------------------|-----------|
| <b>1</b> | <b>Selection mask</b>                                                       | <b>3</b>  |
| <b>2</b> | <b>Top ten emitters for the USA</b>                                         | <b>4</b>  |
| <b>3</b> | <b>Regional results</b>                                                     | <b>5</b>  |
| 3.1      | North America . . . . .                                                     | 5         |
| 3.2      | South America . . . . .                                                     | 7         |
| 3.3      | Europe . . . . .                                                            | 8         |
| 3.4      | West Africa . . . . .                                                       | 9         |
| 3.5      | South Africa . . . . .                                                      | 10        |
| 3.6      | West Russia/East Europe . . . . .                                           | 11        |
| 3.7      | Siberia/Mongolia . . . . .                                                  | 12        |
| 3.8      | Middle East . . . . .                                                       | 13        |
| 3.9      | India/Pakistan/West China . . . . .                                         | 14        |
| 3.10     | East China/South East Asia . . . . .                                        | 15        |
| 3.11     | East Asia . . . . .                                                         | 16        |
| 3.12     | Indonesia/Malaysia . . . . .                                                | 17        |
| 3.13     | Australia/New Zealand . . . . .                                             | 18        |
| <b>4</b> | <b>Comparison between NO<sub>x</sub> emissions and power plant capacity</b> | <b>19</b> |

## 1 Selection mask

In order to reduce processing time, we define a lat/lon mask for TROPOMI pixels to be processed. This mask is based on a pre-selection of potential stationary sources derived from TROPOMI data.

In a first step, we calculate maps of monthly mean, minimum and maximum NO<sub>2</sub> TVCDs for 2018-2019, including valid ( $qa > 0.75$ ) and cloud free ( $CF < 0.3$ ) observations up to an SZA of 80° on a global lat-lon grid of 0.025° resolution from 61° S to 61° N. Fig. 1(a) displays the annual mean NO<sub>2</sub> TVCD for 2019. Note that due to long range transport or a potential bias in the stratospheric correction, TVCDs might be enhanced for regions without local emissions. In addition, regions exposed to seasonal biomass burning or lightning can show enhanced NO<sub>2</sub> columns that are not caused by stationary point sources. Thus, the mask is not just defined based on an absolute column threshold.

Instead, we define pixels that likely contain stationary sources based on the following three criteria, where thresholds have been derived empirically such that industrial regions are kept while non-stationary sources like biomass burning regions are removed:

1. Sufficient statistic: Monthly means (based on at least 5 valid TROPOMI overpasses) must be available for at least 6 months during the 24 month period 2018-2019.
2. Local maximum: the mean TVCD for 2019 must be enhanced by more than  $0.5 \times 10^{15}$  molec cm<sup>-2</sup> compared to the local background. This criterion is sensitive for all kind of NO<sub>x</sub> sources, including biomass burning.
3. High dynamical range all over the year: The difference between monthly maximum and minimum must exceed  $1.5 \times 10^{15}$  molec cm<sup>-2</sup> for at least 90% of the available months.

Due to changing wind patterns, a high dynamical range of TVCDs is expected around stationary sources. For biomass burning, this is only fulfilled during burning season. This criterion thus removes biomass burning regions.

All pixels fulfilling these criteria are considered as candidates for stationary NO<sub>x</sub> sources. We now define a mask **M** on 1° resolution, where every grid pixel  $i, j$  containing a stationary source candidate is set to  $M_{i,j}=3$ .

As the further analysis is based on peaks in the divergence map around point sources, also the surrounding of stationary sources should be kept. Thus, the mask values for all neighboring 1° pixels  $i \pm 1, j \pm 1$  with  $M_{i,j}=3$  are set to 2 (if not set to 3 already), and all pixels with  $M_{i,j} \geq 2$  are considered for the calculation of fluxes and divergence. Note that even at 60° N, this corresponds to adding more than 50 km in longitude, which is far more than the 30 km radius considered for peak classification (sect. 3.8).

For all second next neighboring pixels  $i \pm 2, j \pm 2$ , mask values are set to 1 (if not set to 2 or 3 already). Values  $M_{i,j} \geq 1$  are used for the extraction of ECMWF data, which are required for a larger area to enable spatial interpolation later on.

The resulting mask **M** is displayed in Fig. 1(b) and provided as supplementary datafile. Most parts of the continents are kept, except deserts and forests. Open oceans are completely skipped. The application of the mask reduces the amount of pixels included in the further analysis to 13.5% and thereby enables the processing of fluxes on a common desktop computer.

## 2 Top ten emitters for the USA

We compare the catalog entries and listed emissions exemplarily to the top ten emitters of the USA in 2019 as reported by EPA (Table S1; EPA data from <https://ampd.epa.gov/ampd/>). Seven out of these ten power plants are listed in the point source catalog, with correct naming derived from the merging of GPPD information. For the 3 missing plants, also a peak in the divergence map is visible (Fig. S1), but the automated algorithm classified these all as “negative”, i.e. a large negative divergence is observed around the plants. As explained in section 3.8.1, this might indicate high noise levels of  $D$  or systematic artefacts which might be caused by biased wind fields. Thus, these cases are excluded within the automatized point source identification.

For a discussion of the low biased catalog emissions see section 5.2.6.

**Table S1.** Top ten NO<sub>x</sub> emitters for the USA in 2019 as listed by EPA. Seven of these emitters are listed in the catalog, where a GPPD entry was automatically found matching the name in the EPA list for all cases.

| Name          | Emissions (EPA)<br>(kg/s) | Emissions (this study)<br>(kg/s) |
|---------------|---------------------------|----------------------------------|
| New Madrid    | 0.446                     | 0.074                            |
| Colstrip      | 0.432                     | 0.079                            |
| Miami Fort    | 0.360                     | 0.053                            |
| Navajo        | 0.351                     | 0.115                            |
| Hunter        | 0.333                     | 0.040                            |
| Scherer       | 0.319                     | -                                |
| Martin Lake   | 0.301                     | -                                |
| Fort Martin   | 0.298                     | -                                |
| Intermountain | 0.287                     | 0.054                            |
| Thomas Hill   | 0.285                     | 0.037                            |

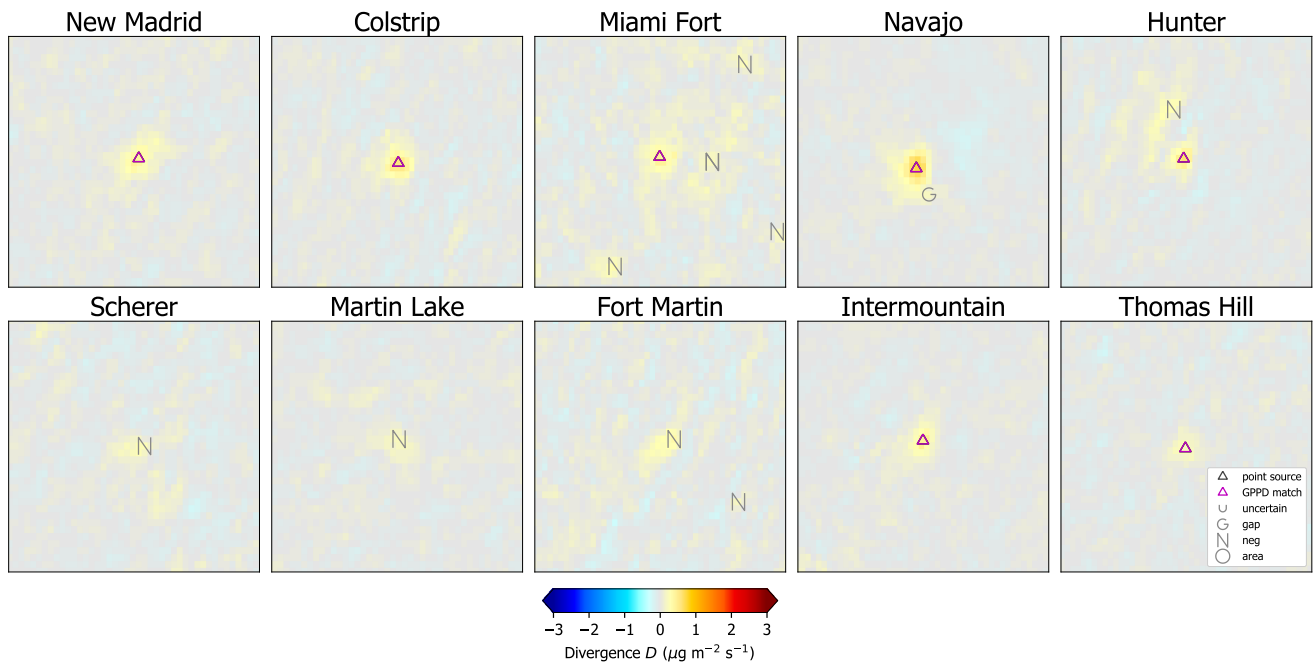

**Figure S1.** Zooms of the divergence map (100×100 km<sup>2</sup>) and candidate classification results for the USA top ten emitters in 2019 as reported by EPA.

### 3 Regional results

In this section, regional zooms of the divergence map and tables of regional top emitters are provided for all considered regions. The legend for point sources, candidates and the divergence colorbar are the same as in Fig. S1. For sake of clarity, non-point sources are only shown for candidates with  $D_{\max} > 1 \mu\text{g m}^{-2} \text{s}^{-1}$  or the integrated divergence within 30 km exceeding  $0.1 \text{ kg s}^{-1}$ . Numbers given in the divergence map refer to the regional ranking as listed in the respective table. For the GPPD matches, fuel and name are only given for the power plant with largest capacity within 5 km.

#### 3.1 North America

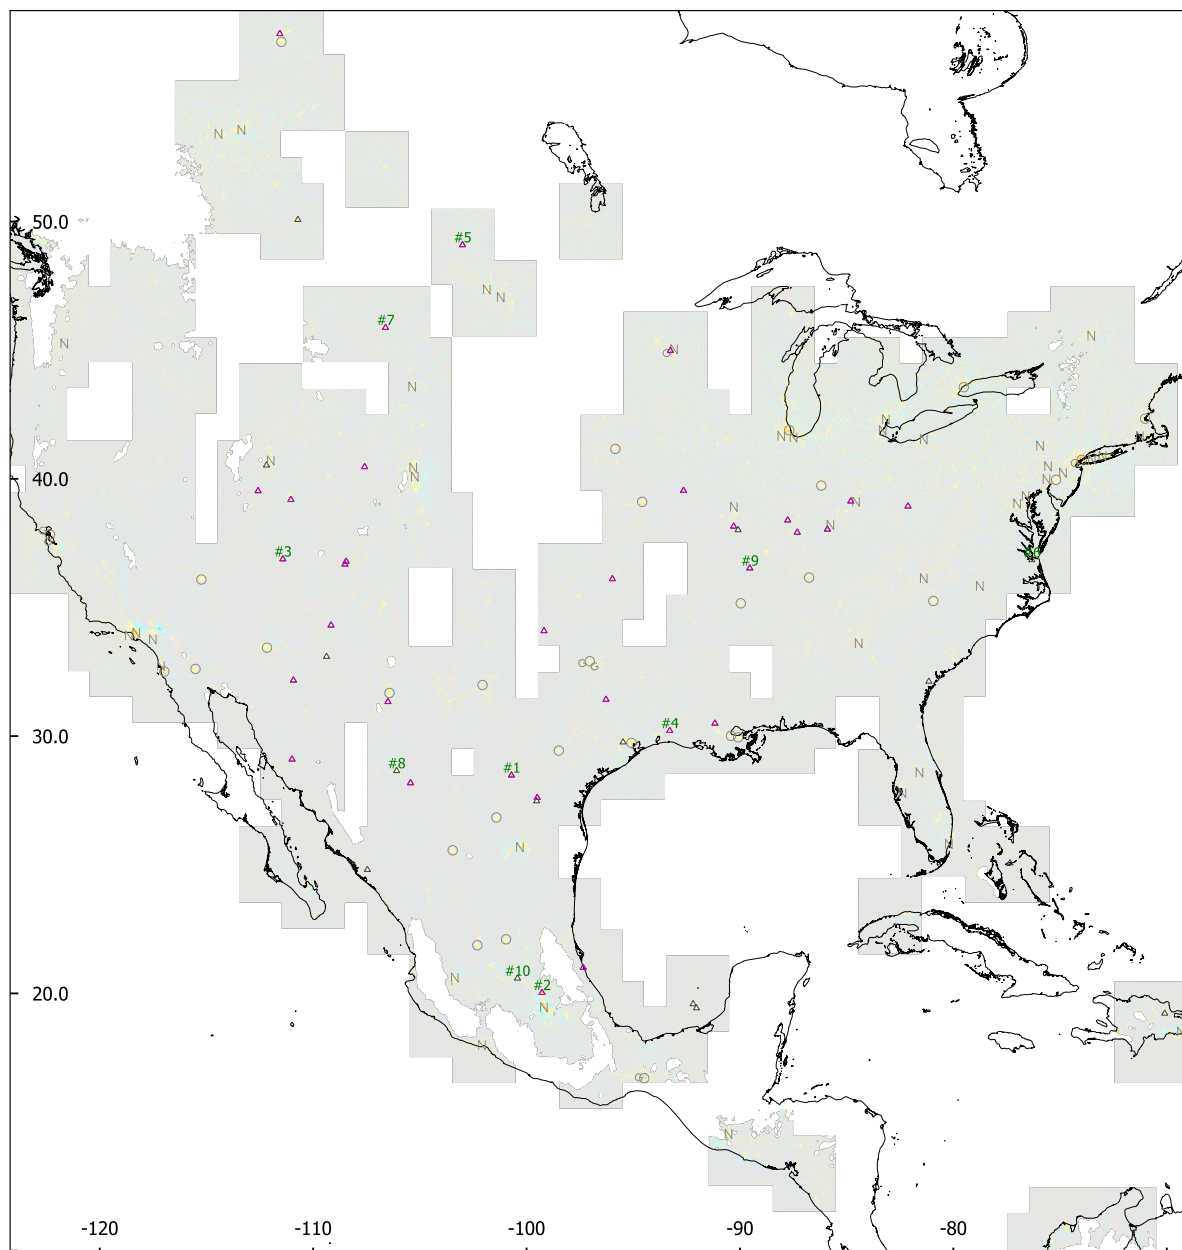

**Figure S2.** Divergence map and candidate classification results for North America. The regional top ten, as listed in table xy, are marked.

**Table S2.** Top 10 point sources for North America.

| Rank<br>(regional) | Rank<br>(global) | Lat<br>[° N] | Lon<br>[° E] | Emissions<br>[kg/s] | Capacity<br>[GW] | Fuel | Name                        |
|--------------------|------------------|--------------|--------------|---------------------|------------------|------|-----------------------------|
| 1                  | 74               | 28.481       | -100.705     | 0.175               | 2.780            | Gas  | Carbón II                   |
| 2                  | 91               | 20.028       | -99.276      | 0.159               | 2.228            | Oil  | Francisco Pérez Ríos (Tula) |
| 3                  | 153              | 36.881       | -111.420     | 0.115               | 2.409            | Coal | Navajo                      |
| 4                  | 159              | 30.209       | -93.289      | 0.112               | 0.851            | Gas  | RS Cogen                    |
| 5                  | 184              | 49.092       | -103.000     | 0.099               | 0.672            | Coal | Boundary Dam                |
| 6                  | 236              | 36.847       | -76.324      | 0.079               |                  |      |                             |
| 7                  | 237              | 45.879       | -106.608     | 0.079               | 2.272            | Coal | Colstrip                    |
| 8                  | 249              | 28.652       | -106.090     | 0.076               |                  |      |                             |
| 9                  | 258              | 36.527       | -89.541      | 0.074               | 1.300            | Coal | New Madrid                  |
| 10                 | 262              | 20.585       | -100.426     | 0.073               |                  |      |                             |

## 3.2 South America

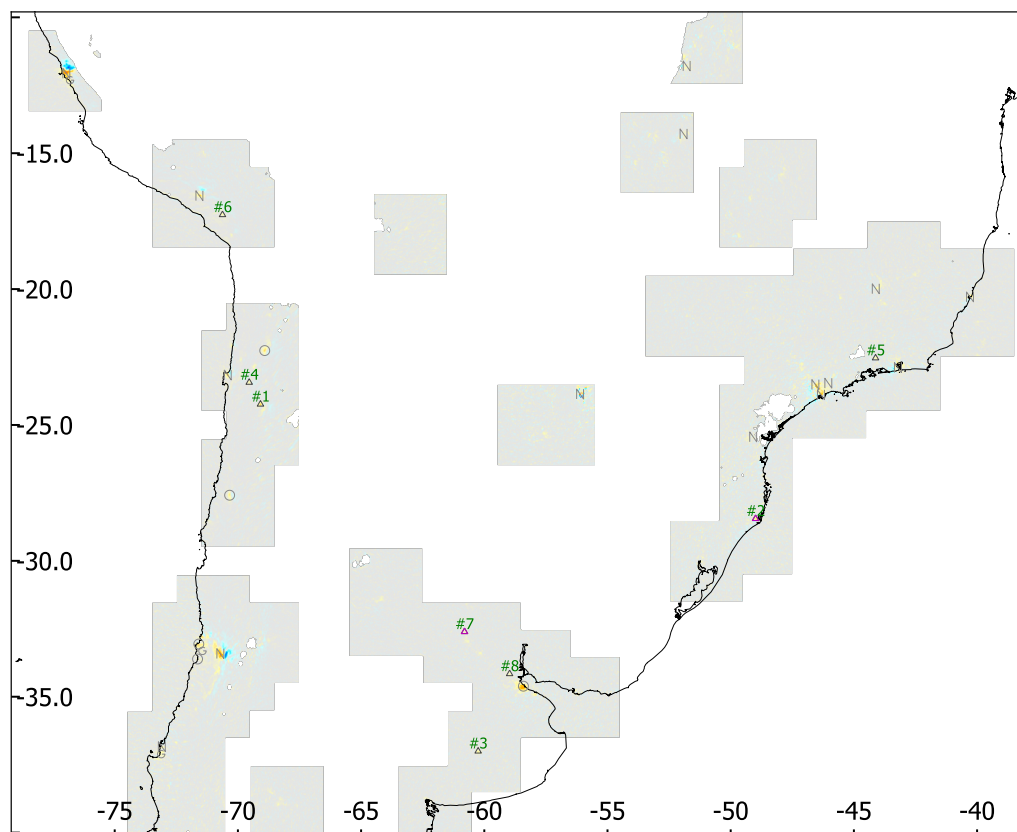

**Figure S3.** Divergence map and candidate classification results for South America.

**Table S3.** Point sources for South America.

| Rank<br>(regional) | Rank<br>(global) | Lat<br>[° N] | Lon<br>[° E] | Emissions<br>[kg/s] | Capacity<br>[GW] | Fuel | Name                           |
|--------------------|------------------|--------------|--------------|---------------------|------------------|------|--------------------------------|
| 1                  | 157              | -24.238      | -69.084      | 0.113               | 0.857            | Coal | Jorge Lacerda IV               |
| 2                  | 191              | -28.449      | -48.990      | 0.095               |                  |      |                                |
| 3                  | 238              | -37.004      | -60.249      | 0.079               |                  |      |                                |
| 4                  | 272              | -23.434      | -69.541      | 0.069               |                  |      |                                |
| 5                  | 300              | -22.537      | -44.121      | 0.062               |                  |      |                                |
| 6                  | 412              | -17.266      | -70.625      | 0.038               | 1.425            | Gas  | CENTRAL TERMoeLECTRICA TIMBUES |
| 7                  | 414              | -32.610      | -60.803      | 0.038               |                  |      |                                |
| 8                  | 436              | -34.157      | -58.973      | 0.034               |                  |      |                                |

## 3.3 Europe

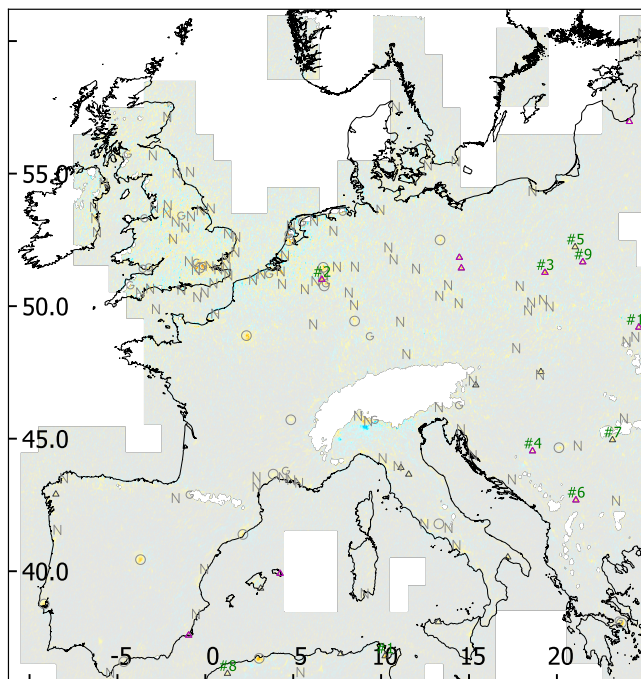

**Figure S4.** Divergence map and candidate classification results for Europe.

**Table S4.** Top 10 point sources for Europe. Note that #1 and #8 are in Northern Africa.

| Rank<br>(regional) | Rank<br>(global) | Lat<br>[° N] | Lon<br>[° E] | Emissions<br>[kg/s] | Capacity<br>[GW] | Fuel | Name                                         |
|--------------------|------------------|--------------|--------------|---------------------|------------------|------|----------------------------------------------|
| 1                  | 54               | 36.802       | 10.224       | 0.225               |                  |      |                                              |
| 2                  | 87               | 51.006       | 6.627        | 0.163               | 7.598            | Coal | Niederaussem power station                   |
| 3                  | 110              | 51.268       | 19.320       | 0.148               | 5.472            | Coal | Bełchatów                                    |
| 4                  | 164              | 44.533       | 18.614       | 0.107               | 0.730            | Coal | Tuzla CHP Power Plant Bosnia and Herzegovina |
| 5                  | 179              | 52.231       | 21.036       | 0.101               |                  |      |                                              |
| 6                  | 183              | 42.681       | 21.082       | 0.099               | 2.713            | Coal | Kosovo A Coal Power Plant Kosovo             |
| 7                  | 194              | 44.952       | 23.163       | 0.093               |                  |      |                                              |
| 8                  | 240              | 36.140       | 1.259        | 0.078               |                  |      |                                              |
| 9                  | 251              | 51.664       | 21.473       | 0.076               | 3.748            | Coal | Kozienice                                    |
| 10                 | 254              | 49.200       | 24.663       | 0.076               | 2.334            | Coal | Burshtyn power station                       |

## 3.4 West Africa

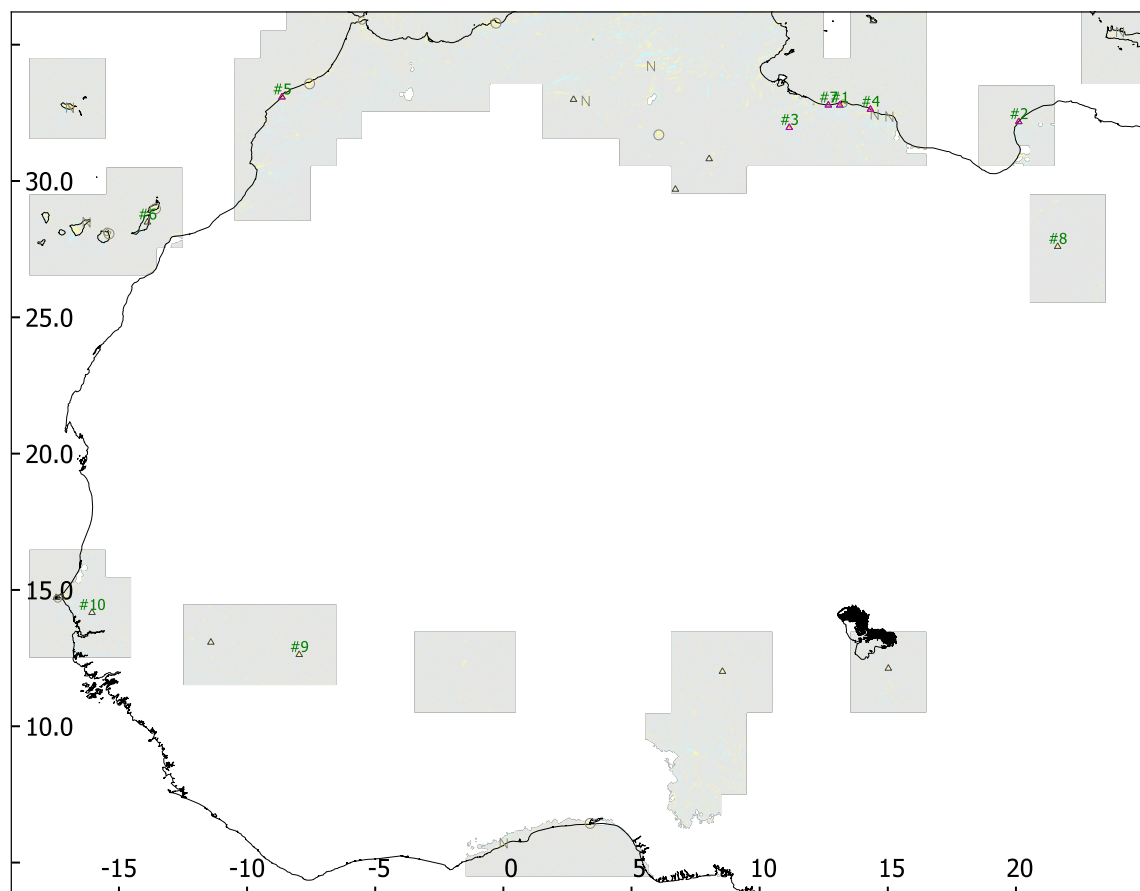

**Figure S5.** Divergence map and candidate classification results for West Africa. Note that two further point sources in North Africa are listed in the results for Europe due to the coarse definition of regions.

**Table S5.** Top 10 point sources for West Africa.

| Rank<br>(regional) | Rank<br>(global) | Lat<br>[° N] | Lon<br>[° E] | Emissions<br>[kg/s] | Capacity<br>[GW] | Fuel | Name                                     |
|--------------------|------------------|--------------|--------------|---------------------|------------------|------|------------------------------------------|
| 1                  | 24               | 32.779       | 13.126       | 0.320               | 0.147            | Gas  | South Tripoli                            |
| 2                  | 65               | 32.171       | 20.110       | 0.187               | 1.040            | Gas  | North Benghazi Station 1                 |
| 3                  | 109              | 31.959       | 11.156       | 0.148               | 0.624            | Gas  | Western Mountain Station- Ruwais         |
| 4                  | 115              | 32.625       | 14.323       | 0.144               | 1.000            | Gas  | Al Khums                                 |
| 5                  | 124              | 33.077       | -8.638       | 0.135               | 2.020            | Coal | Centrale Thermique de Jorf Lasfar (JLEC) |
| 6                  | 156              | 28.489       | -13.888      | 0.113               |                  |      |                                          |
| 7                  | 176              | 32.781       | 12.680       | 0.102               | 1.920            | Gas  | Az Zawiyah                               |
| 8                  | 193              | 27.595       | 21.629       | 0.094               |                  |      |                                          |
| 9                  | 203              | 12.626       | -7.965       | 0.091               |                  |      |                                          |
| 10                 | 284              | 14.168       | -16.051      | 0.066               |                  |      |                                          |

3.5 South Africa

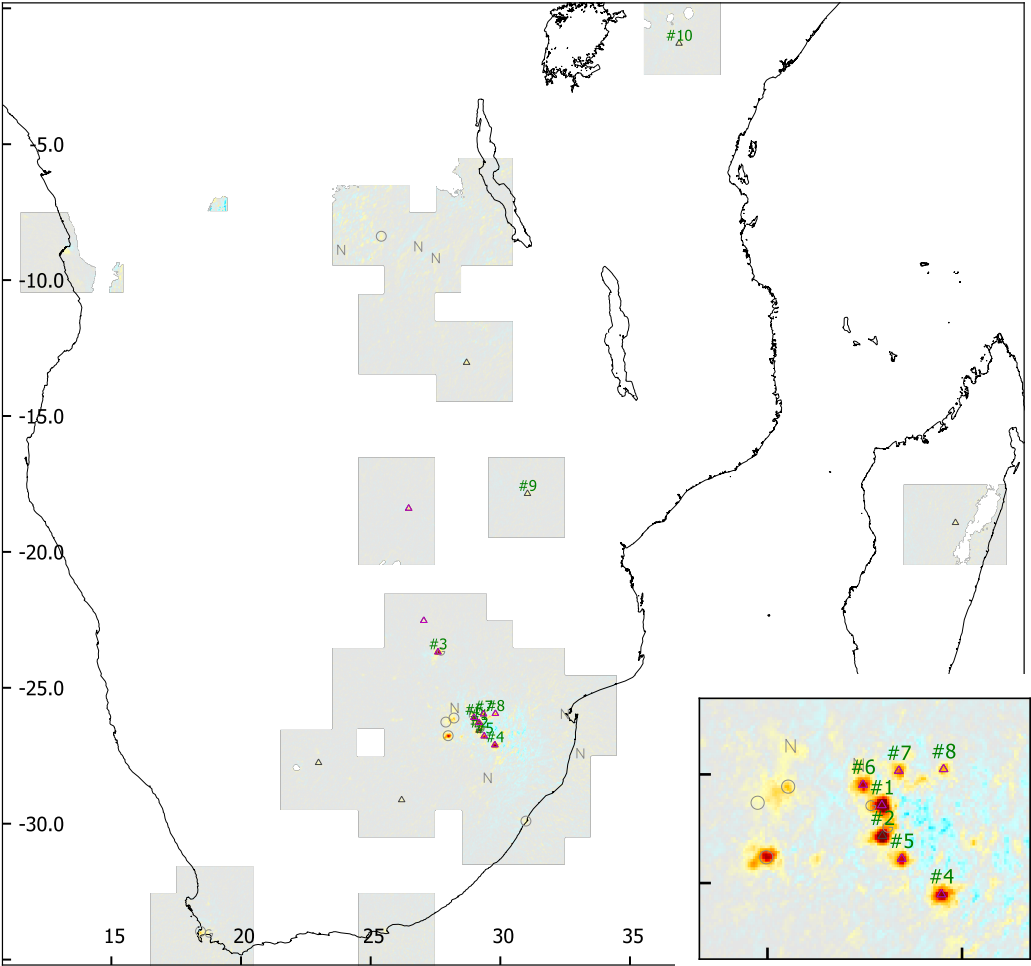

**Figure S6.** Divergence map and candidate classification results for South Africa, including a zoom for the Highveld with several coal-fired power plants.

**Table S6.** Top 10 point sources for South Africa.

| Rank<br>(regional) | Rank<br>(global) | Lat<br>[° N] | Lon<br>[° E] | Emissions<br>[kg/s] | Capacity<br>[GW] | Fuel | Name                  |
|--------------------|------------------|--------------|--------------|---------------------|------------------|------|-----------------------|
| 1                  | 1                | -26.284      | 29.176       | 0.886               | 6.600            | Coal | Matla power station   |
| 2                  | 2                | -26.566      | 29.181       | 0.679               |                  |      |                       |
| 3                  | 3                | -23.686      | 27.594       | 0.669               | 3.990            | Coal | Matimba power station |
| 4                  | 4                | -27.104      | 29.788       | 0.668               | 4.110            | Coal | Majuba power station  |
| 5                  | 8                | -26.777      | 29.379       | 0.474               | 3.654            | Coal | Tutuka power station  |
| 6                  | 12               | -26.096      | 28.982       | 0.437               | 4.116            | Coal | Kendal power station  |
| 7                  | 46               | -25.967      | 29.350       | 0.242               | 3.600            | Coal | Duvha power station   |
| 8                  | 84               | -25.952      | 29.810       | 0.164               | 2.352            | Coal | Arnot power station   |
| 9                  | 223              | -17.855      | 31.047       | 0.082               |                  |      |                       |
| 10                 | 243              | -1.291       | 36.892       | 0.077               |                  |      |                       |

3.6 West Russia/East Europe

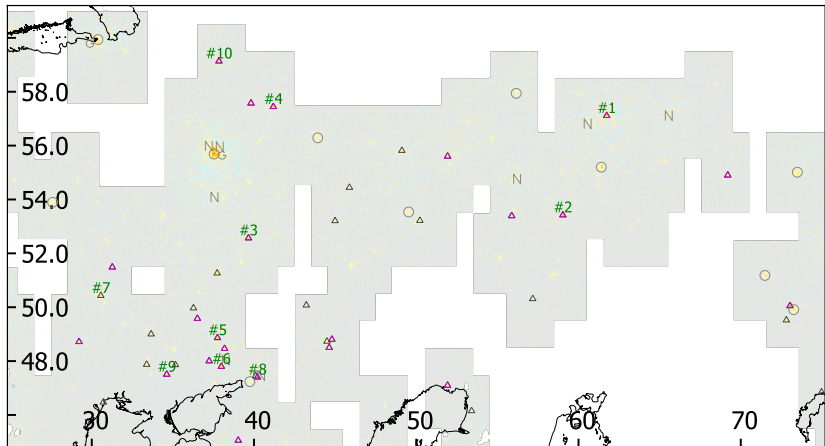

**Figure S7.** Divergence map and candidate classification results for West Russia/East Europe.

**Table S7.** Top 10 point sources for West Russia/East Europe.

| Rank<br>(regional) | Rank<br>(global) | Lat<br>[° N] | Lon<br>[° E] | Emissions<br>[kg/s] | Capacity<br>[GW] | Fuel | Name                     |
|--------------------|------------------|--------------|--------------|---------------------|------------------|------|--------------------------|
| 1                  | 51               | 57.111       | 61.737       | 0.232               | 3.800            | Coal | Reftinskaya GRES         |
| 2                  | 61               | 53.422       | 59.036       | 0.197               | 0.330            | Coal | CHP Plant of MMK         |
| 3                  | 66               | 52.568       | 39.657       | 0.187               | 0.432            | Gas  | NLMK cogeneration plant  |
| 4                  | 80               | 57.443       | 41.187       | 0.169               | 3.600            | Gas  | Krostromskaya            |
| 5                  | 81               | 48.864       | 37.748       | 0.169               | 0.600            | Coal | Slavyansk power station  |
| 6                  | 86               | 47.796       | 37.985       | 0.163               | 1.775            | Coal | Starobeshivska           |
| 7                  | 89               | 50.431       | 30.560       | 0.161               |                  |      |                          |
| 8                  | 127              | 47.402       | 40.208       | 0.134               | 2.214            | Coal | Novocherkasskaya GRES    |
| 9                  | 138              | 47.506       | 34.621       | 0.123               | 2.825            | Coal | Zaporizhia power station |
| 10                 | 141              | 59.136       | 37.840       | 0.122               | 0.446            | Gas  | CHP-PVS                  |

3.7 Siberia/Mongolia

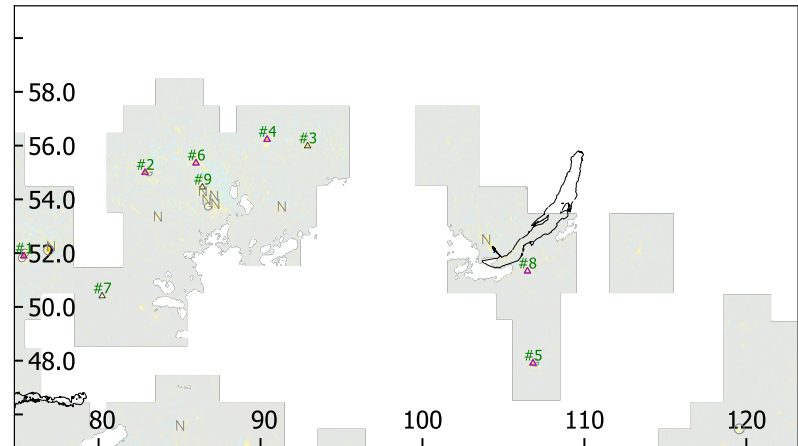

**Figure S8.** Divergence map and candidate classification results for Siberia/Mongolia.

**Table S8.** Point sources for Siberia/Mongolia.

| Rank<br>(regional) | Rank<br>(global) | Lat<br>[° N] | Lon<br>[° E] | Emissions<br>[kg/s] | Capacity<br>[GW] | Fuel | Name                                         |
|--------------------|------------------|--------------|--------------|---------------------|------------------|------|----------------------------------------------|
| 1                  | 26               | 51.893       | 75.386       | 0.315               | 4.000            | Coal | Ekibastuz-1 power station                    |
| 2                  | 45               | 55.000       | 82.871       | 0.244               | 0.852            | Coal | Novosibirsk CHP-3                            |
| 3                  | 118              | 55.986       | 92.909       | 0.140               |                  |      |                                              |
| 4                  | 143              | 56.229       | 90.405       | 0.121               | 0.320            | Coal | CHP of the Achinsk Alumina Combine (TPP AGK) |
| 5                  | 162              | 47.905       | 106.827      | 0.109               | 0.768            | Coal | Ulaanbaatar-4 Thermal Power Plant            |
| 6                  | 197              | 55.350       | 86.015       | 0.093               | 1.050            | Coal | NOVO-KEMEROVO CHP                            |
| 7                  | 247              | 50.406       | 80.218       | 0.076               |                  |      |                                              |
| 8                  | 320              | 51.330       | 106.483      | 0.058               | 1.160            | Coal | Gusinoozyorskaya                             |
| 9                  | 347              | 54.455       | 86.410       | 0.050               |                  |      |                                              |

## 3.8 Middle East

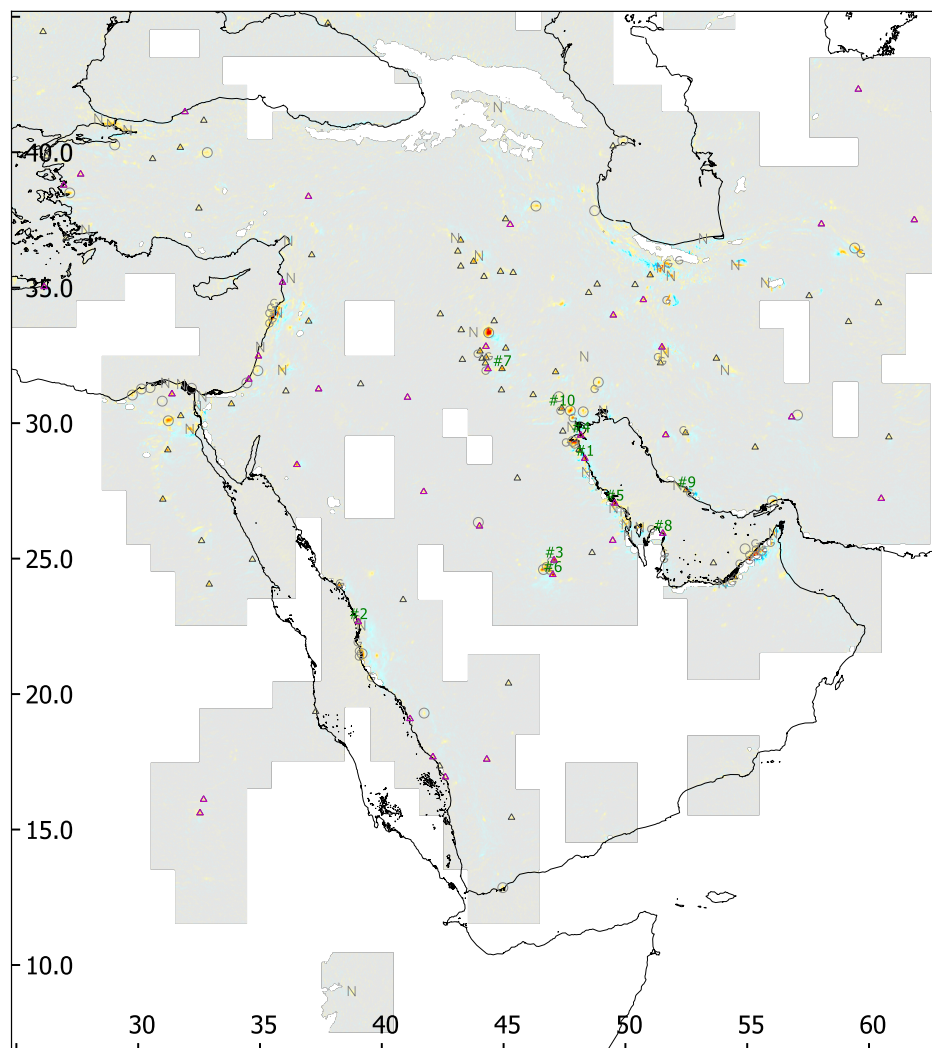

**Figure S9.** Divergence map and candidate classification results for the Middle East.

**Table S9.** Top 10 point sources for the Middle East.

| Rank<br>(regional) | Rank<br>(global) | Lat<br>[° N] | Lon<br>[° E] | Emissions<br>[kg/s] | Capacity<br>[GW] | Fuel | Name                                             |
|--------------------|------------------|--------------|--------------|---------------------|------------------|------|--------------------------------------------------|
| 1                  | 9                | 28.696       | 48.334       | 0.460               | 6.905            | Gas  | Az Zour South CCGT                               |
| 2                  | 11               | 22.668       | 39.038       | 0.438               | 9.308            | Oil  | RABIGH                                           |
| 3                  | 13               | 24.940       | 47.071       | 0.428               | 3.617            | Oil  | Riyadh 9                                         |
| 4                  | 15               | 29.551       | 48.168       | 0.372               | 5.367            | Gas  | Sabiya                                           |
| 5                  | 16               | 27.044       | 49.559       | 0.368               | 0.250            | Gas  | JUBAIL COGEN (JEC)                               |
| 6                  | 19               | 24.407       | 47.017       | 0.347               | 3.161            | Oil  | Riyadh 10                                        |
| 7                  | 22               | 32.007       | 44.935       | 0.327               |                  |      |                                                  |
| 8                  | 23               | 25.930       | 51.535       | 0.326               | 4.511            | Gas  | Ras Laffan C (Ras Qartas) CCGT Power Plant Qatar |
| 9                  | 25               | 27.533       | 52.503       | 0.320               |                  |      |                                                  |
| 10                 | 27               | 30.550       | 47.386       | 0.311               |                  |      |                                                  |

3.9 India/Pakistan/West China

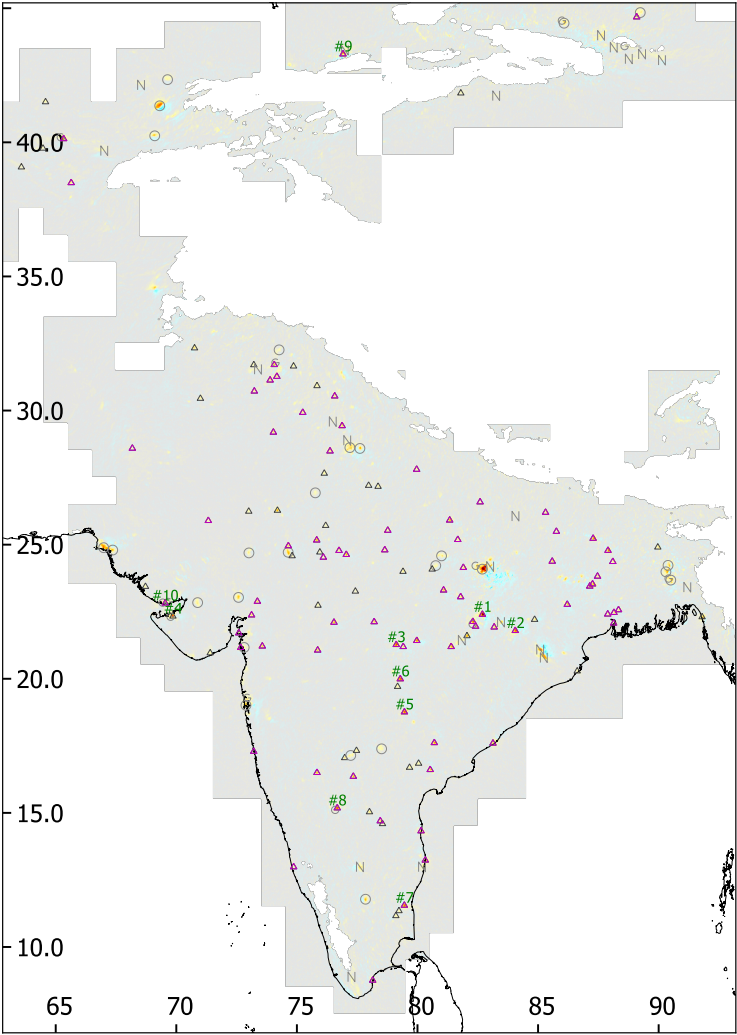

**Figure S10.** Divergence map and candidate classification results for India/Pakistan/West China.

**Table S10.** Top 10 point sources for India/Pakistan/West China.

| Rank<br>(regional) | Rank<br>(global) | Lat<br>[° N] | Lon<br>[° E] | Emissions<br>[kg/s] | Capacity<br>[GW] | Fuel | Name            |
|--------------------|------------------|--------------|--------------|---------------------|------------------|------|-----------------|
| 1                  | 5                | 22.397       | 82.692       | 0.588               | 4.830            | Coal | KORBA STPS      |
| 2                  | 17               | 21.792       | 84.055       | 0.358               | 0.600            | Coal | STERLITE TPP    |
| 3                  | 18               | 21.268       | 79.120       | 0.350               | 3.740            | Coal | KORADI          |
| 4                  | 20               | 22.331       | 69.860       | 0.328               |                  |      |                 |
| 5                  | 21               | 18.759       | 79.459       | 0.327               | 2.600            | Coal | R GUNDEM STPS   |
| 6                  | 29               | 19.991       | 79.285       | 0.298               | 2.920            | Coal | CHANDRAPUR Coal |
| 7                  | 30               | 11.550       | 79.455       | 0.295               | 3.240            | Coal | NEYVELI ST II   |
| 8                  | 31               | 15.180       | 76.673       | 0.292               | 0.860            | Coal | TORANGALLU EXT  |
| 9                  | 34               | 43.290       | 76.912       | 0.278               | 0.145            | Coal | Almaty CHP-1    |
| 10                 | 37               | 22.816       | 69.540       | 0.272               | 8.620            | Coal | MUNDRA TPP      |

3.10 East China/South East Asia

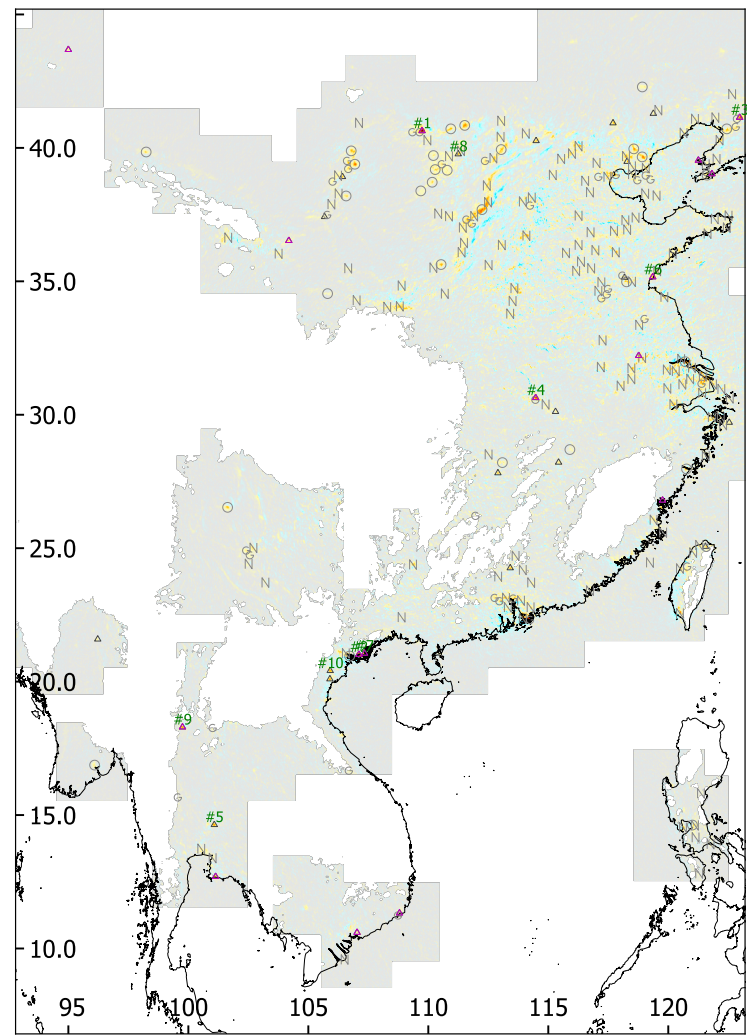

**Figure S11.** Divergence map and candidate classification results for East China/South East Asia.

**Table S11.** Top 10 point sources for East China/South East Asia.

| Rank<br>(regional) | Rank<br>(global) | Lat<br>[° N] | Lon<br>[° E] | Emissions<br>[kg/s] | Capacity<br>[GW] | Fuel | Name                                      |
|--------------------|------------------|--------------|--------------|---------------------|------------------|------|-------------------------------------------|
| 1                  | 6                | 40.637       | 109.739      | 0.528               | 0.200            | Coal | Baotou Works power station                |
| 2                  | 14               | 21.015       | 107.107      | 0.418               | 1.200            | Coal | Quang Ninh 1                              |
| 3                  | 28               | 41.137       | 122.974      | 0.300               | 0.345            | Coal | Anshan Steel Company No 2 power station   |
| 4                  | 42               | 30.635       | 114.473      | 0.257               | 1.470            | Coal | Qingshan power station                    |
| 5                  | 47               | 14.638       | 101.081      | 0.241               |                  |      |                                           |
| 6                  | 48               | 35.161       | 119.352      | 0.238               | 0.660            | Coal | Rizhao Iron and Steel Cogen power station |
| 7                  | 55               | 21.060       | 107.343      | 0.217               | 2.200            | Coal | Mong Duong 2                              |
| 8                  | 59               | 39.770       | 111.247      | 0.202               |                  |      |                                           |
| 9                  | 60               | 18.294       | 99.756       | 0.202               | 2.400            | Coal | Mae Mah                                   |
| 10                 | 62               | 20.409       | 105.911      | 0.197               |                  |      |                                           |

3.11 East Asia

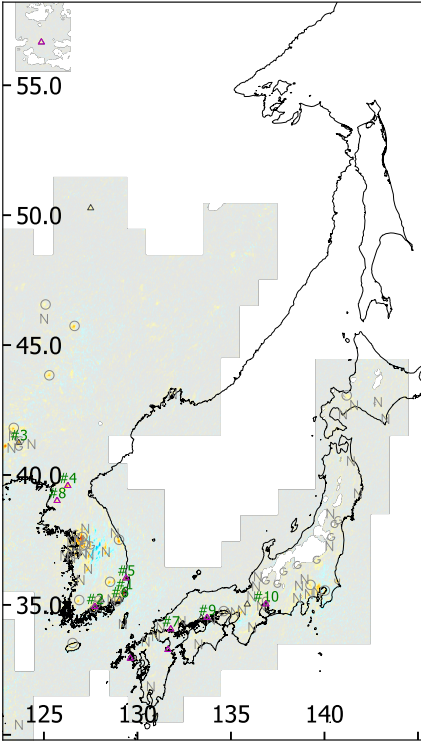

**Figure S12.** Divergence map and candidate classification results for East Asia.

**Table S12.** Top 10 point sources for East Asia.

| Rank<br>(regional) | Rank<br>(global) | Lat<br>[° N] | Lon<br>[° E] | Emissions<br>[kg/s] | Capacity<br>[GW] | Fuel | Name                         |
|--------------------|------------------|--------------|--------------|---------------------|------------------|------|------------------------------|
| 1                  | 7                | 35.502       | 129.303      | 0.523               |                  |      |                              |
| 2                  | 10               | 34.930       | 127.723      | 0.460               | 1.330            | Gas  | Gwangyang Works              |
| 3                  | 41               | 41.239       | 123.654      | 0.258               |                  |      |                              |
| 4                  | 79               | 39.586       | 126.277      | 0.171               | 1.600            | Coal | Pukchang power station       |
| 5                  | 103              | 36.028       | 129.390      | 0.150               | 0.491            | Gas  | Pohang Works                 |
| 6                  | 120              | 35.197       | 129.053      | 0.137               |                  |      |                              |
| 7                  | 168              | 34.068       | 131.780      | 0.105               | 0.481            | Coal | Nanyo Complex power station  |
| 8                  | 181              | 39.010       | 125.704      | 0.100               | 0.900            | Coal | East Pyongyang power station |
| 9                  | 190              | 34.509       | 133.722      | 0.096               | 1.312            | Oil  | Tamashima                    |
| 10                 | 224              | 35.030       | 136.871      | 0.082               | 6.325            | Oil  | Shin Nagoya                  |

## 3.12 Indonesia/Malaysia

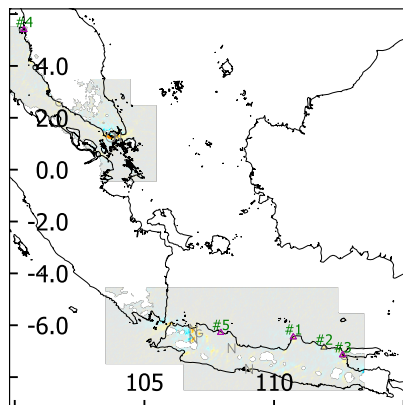

**Figure S13.** Divergence map and candidate classification results for Indonesia/Malaysia.

**Table S13.** Point sources for Indonesia/Malaysia.

| Rank<br>(regional) | Rank<br>(global) | Lat<br>[° N] | Lon<br>[° E] | Emissions<br>[kg/s] | Capacity<br>[GW] | Fuel | Name                            |
|--------------------|------------------|--------------|--------------|---------------------|------------------|------|---------------------------------|
| 1                  | 111              | -6.458       | 110.741      | 0.146               | 2.644            | Coal | PLTU Tanjung Jati B - expansion |
| 2                  | 112              | -6.852       | 111.921      | 0.146               |                  |      |                                 |
| 3                  | 114              | -7.148       | 112.643      | 0.145               | 2.179            | Gas  | PLTGU Gresik                    |
| 4                  | 318              | 5.396        | 100.356      | 0.058               | 1.751            | Gas  | TNB Prai                        |
| 5                  | 440              | -6.284       | 107.942      | 0.033               | 0.990            | Coal | PLTU Jawa Barat - Indramayu     |

3.13 Australia/New Zealand

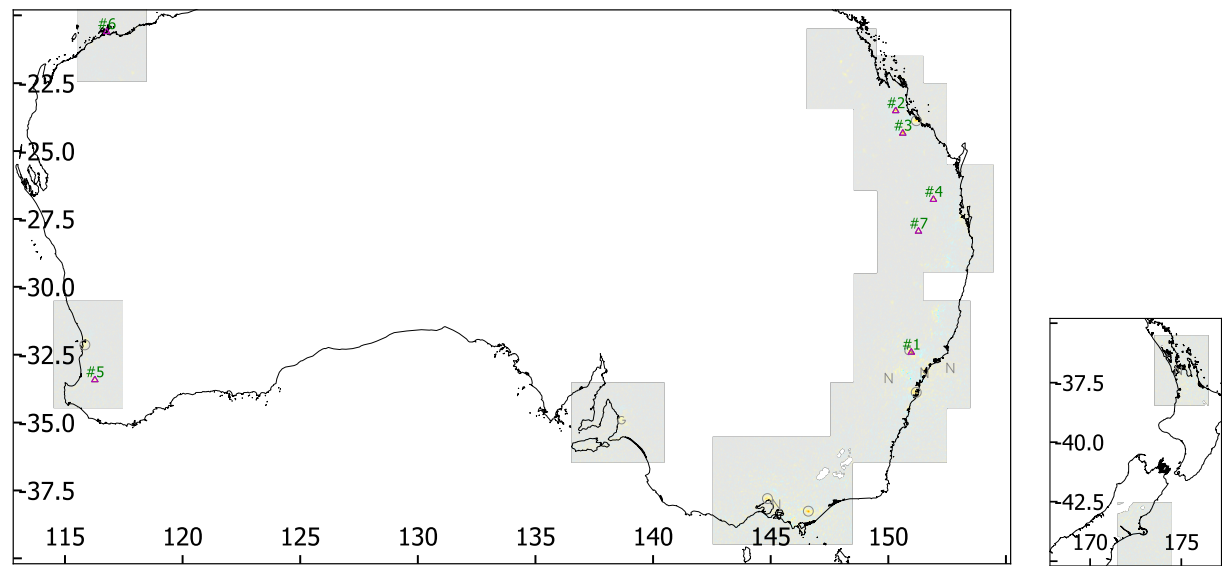

**Figure S14.** Divergence map and candidate classification results for Australia (left) and New Zealand (right).

**Table S14.** Point sources for Australia.

| Rank<br>(regional) | Rank<br>(global) | Lat<br>[° N] | Lon<br>[° E] | Emissions<br>[kg/s] | Capacity<br>[GW] | Fuel | Name                                  |
|--------------------|------------------|--------------|--------------|---------------------|------------------|------|---------------------------------------|
| 1                  | 35               | -32.412      | 150.977      | 0.276               | 4.840            | Coal | Bayswater                             |
| 2                  | 96               | -23.519      | 150.314      | 0.155               | 1.460            | Coal | Stanwell                              |
| 3                  | 98               | -24.346      | 150.615      | 0.152               | 1.540            | Coal | Callide C                             |
| 4                  | 196              | -26.785      | 151.917      | 0.093               | 1.843            | Coal | Tarong                                |
| 5                  | 252              | -33.428      | 116.270      | 0.076               | 1.094            | Coal | Muja D                                |
| 6                  | 369              | -20.608      | 116.771      | 0.045               | 0.400            | Gas  | Burrup Peninsula (Karratha Gas Plant) |
| 7                  | 371              | -27.955      | 151.282      | 0.045               | 0.856            | Coal | Millmerran                            |

#### 4 Comparison between NO<sub>x</sub> emissions and power plant capacity

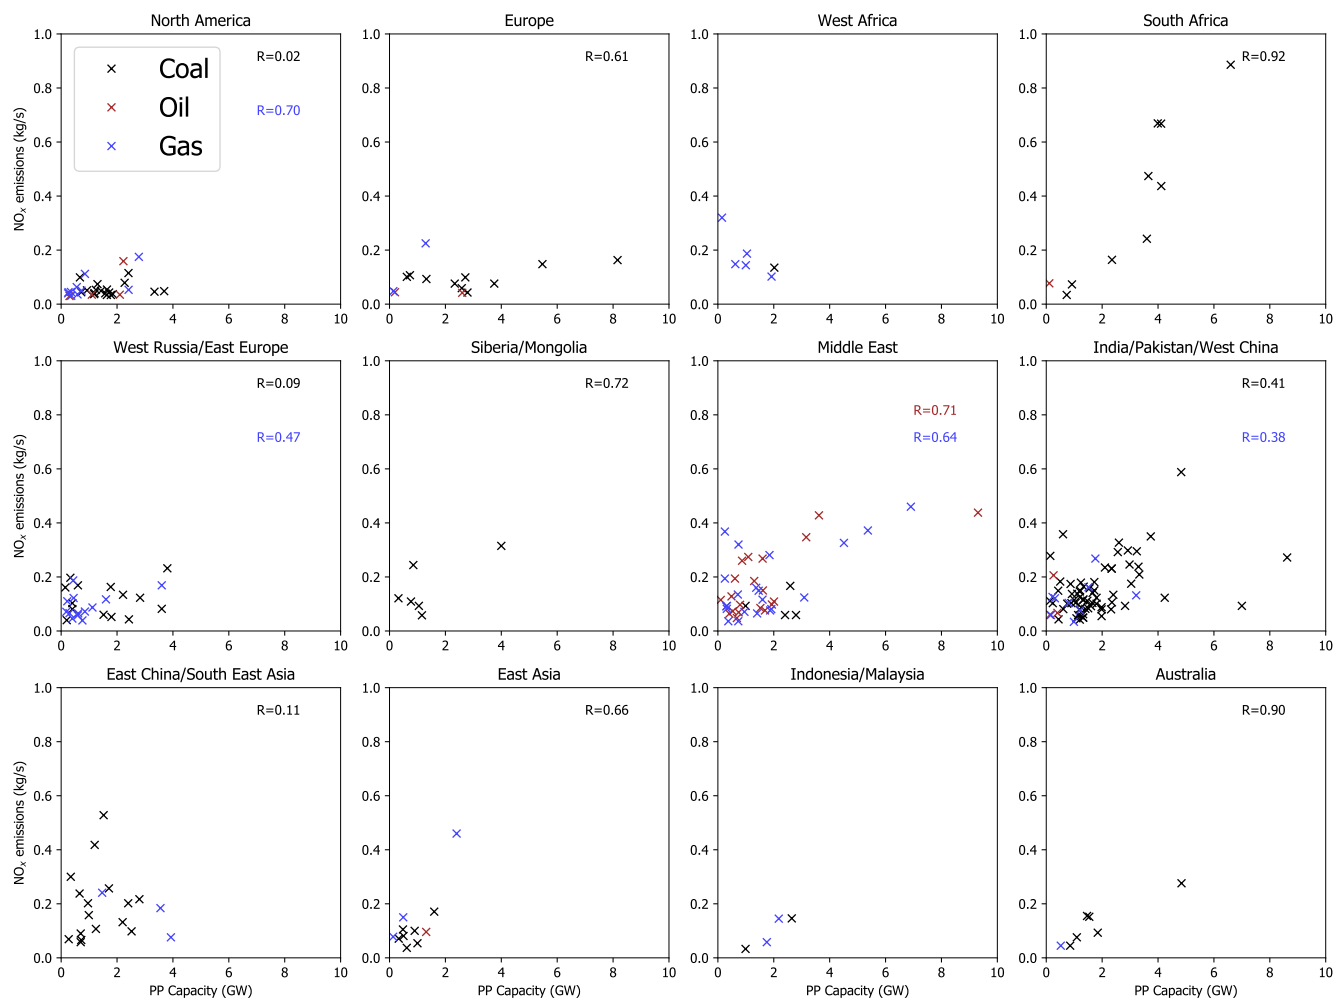

**Figure S15.** Correlation between point source emissions and power plant capacity for the considered regions, except New Zealand (no point source found) and South America (8 point sources/2 power plants). Correlation coefficients are displayed if more than 5 data points are available.
